# Supplementary material
Source: PubMed Central journal article supplement (PMC6916500)
Supplement: supp_RA119.011160_155971_1_supp_429056_q0yw5q.pdf [file supp_RA119.011160_155971_1_supp_429056_q0yw5q.pdf]

## Supplemental Figure Legends

**Figure S1. ACAT expression.** (A) Immunoblot analyses of adipocytes and the stromal vascular fraction (SVF) isolated from the adipose tissue of WT and *ob/ob* mice. CD11b is a macrophage marker. Three age-matched pairs of WT and *ob/ob* mice were used for adipocytes. Ponceau S staining was used as a loading control. (B) Immunoblot analysis of WT and the stable mutant of ACAT2 (ACAT2-C277A). (C) Quantification of protein levels in (B). Two-tailed Student's *t* test was used: mean  $\pm$  S.D.;  $n = 3$ , \*\* $P < 0.01$ .

**Figure S2. ACAT1/2 overexpression decreased LD size.** LD morphology in 3T3-L1 cells stably overexpressing ACAT1/2 on (A) day 8 or (B) day 0 and day 2 after differentiation. Immunofluorescence was carried out with anti-Flag primary antibody on cells expressing Flag-tagged ACAT1/2, but not on EV control cells. Bars = 10  $\mu\text{m}$ . Inlay, Bars = 5  $\mu\text{m}$ . (C) LD morphology in HeLa cells upon ACAT1/2 overexpression. Immunofluorescence was carried out with anti-Flag primary antibody on cells expressing Flag-tagged ACAT1/2, but not on EV control cells. Bars = 10  $\mu\text{m}$ . Inlay, Bars = 1  $\mu\text{m}$ . (D) Distribution of LD sizes in HeLa cells. LDs from  $\sim 10$  cells/each cell type were used.

**Figure S3. Endogenous mRNA levels of *Acat1* and *Acat2* in 3T3-L1 cells during differentiation.** Two-tailed Student's *t* test was used: mean  $\pm$  S.D.;  $n = 3$ , \* $P < 0.05$ . \*\* $P < 0.01$ .

**Fig S1**

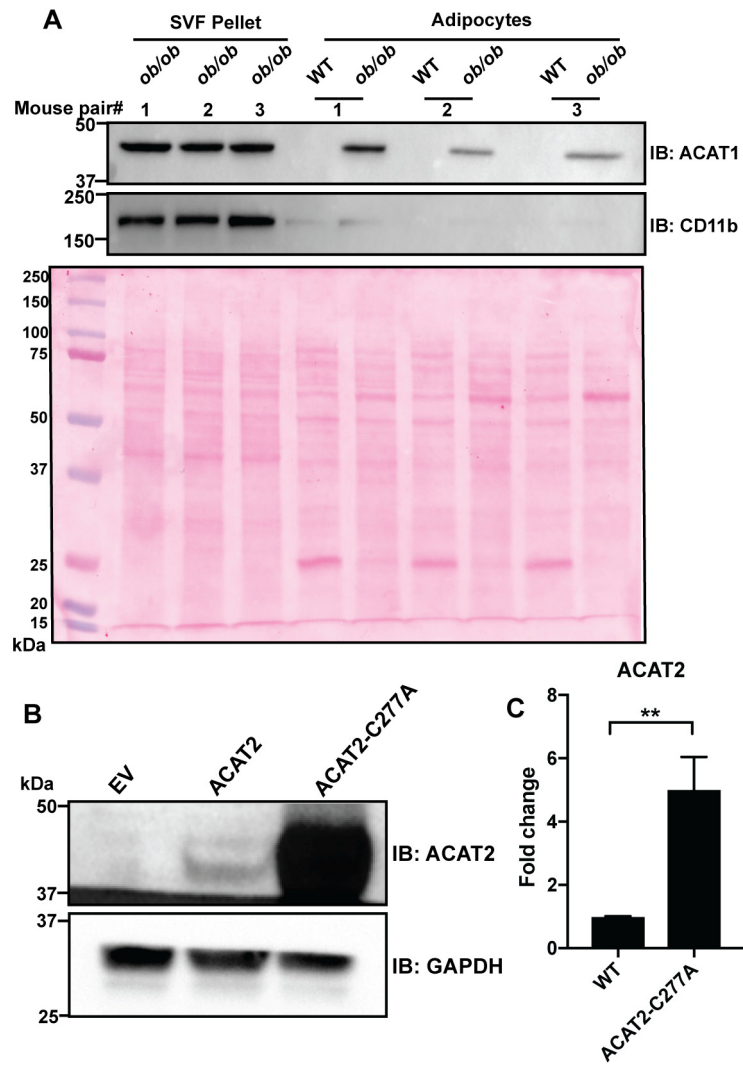

**Fig S2**

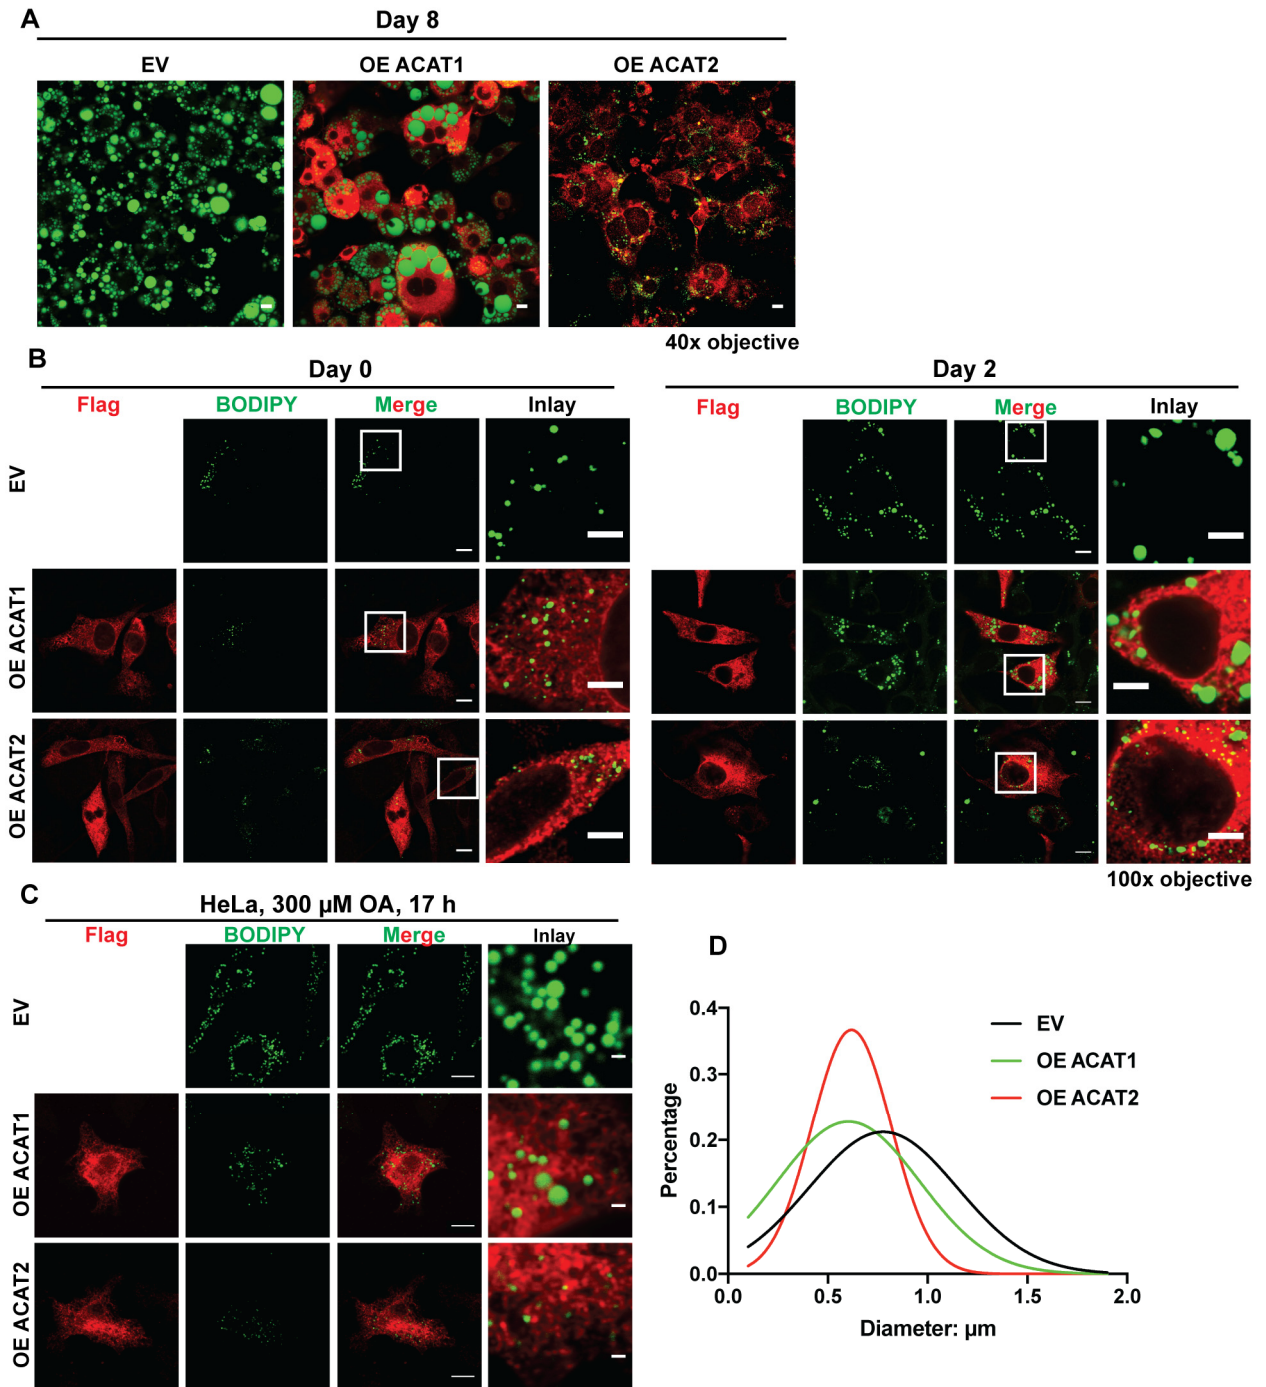

**Fig S3**

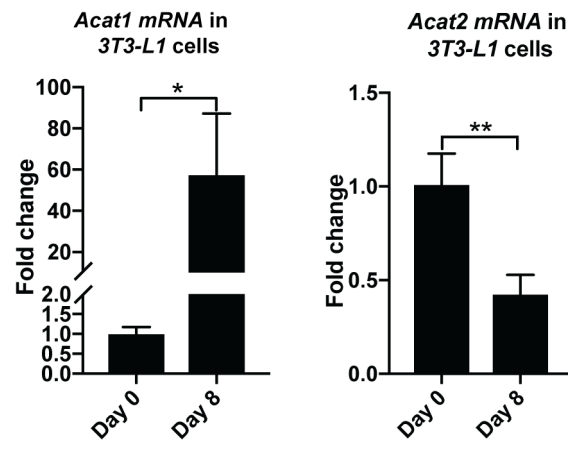

**Table S1 Primer sequences**

| <b><u>Primer</u></b>    | <b><u>Sequence</u></b>                                      |
|-------------------------|-------------------------------------------------------------|
| pBABE-puro-Flag-ACAT1-F | AAAAAGAATTCATGGACTACAAAGATGACGACAA<br>GGTGGGTGAAGAGAAGAT    |
| pBABE-puro-Flag-ACAT1-R | AAAAAGTCGAC CTAAAACACGTAACGACAAGTCC                         |
| pBABE-puro-Flag-ACAT2-F | AAAAAGAATTCATGGACTACAAAGACGATGACGAC<br>AAGGAGCCAGGCGG       |
| pBABE-puro-Flag-ACAT2-R | AAAAAGTCGAC CTAGGTATGGCAGGACCAAG                            |
| RRL-Flag-ACAT1-F        | AAAAAGTTAACATGGACTACAAAGACGATGACGAC<br>AAGAAGGAAGTTGGCAGTCA |
| RRL-Flag-ACAT1-R        | AAAAATCTAGA CTAAAACACGTAACGACAAGTCC                         |
| RRL-Flag-ACAT2-F        | AAAAAGTTAACATGGACTACAAAGACGATGACGAC<br>AAGGAGCCAGGCGG       |
| RRL-Flag-ACAT2-R        | AAAAATCTAGA CTAGGTATGGCAGGACCAAG                            |

**Table S2 Mutant construct primers**

| <b><u>Primer</u></b> | <b><u>Sequence</u></b>                            |
|----------------------|---------------------------------------------------|
| ACAT1<br>H460A.F     | TTTGCTGTATCTGCTGTAGTAGCAGAATATGCCTTGGCTG<br>TTTGC |
| ACAT1<br>H460A.R     | GCAAACAGCCAAGGCATATTCTGCTACTACAGCAGATAC<br>AGCAAA |
| ACAT2<br>H360A.F     | CTCATCTTCTTTGCCTTCCTCGCTTGCTGGCTCAACGCCTT<br>TGCC |
| ACAT2<br>H360A.R     | GGCAAAGGCGTTGAGCCAGCAAGCGAGGAAGGCAAAGA<br>AGATGAG |
| ACAT2<br>C277A.F     | AGCTACCTCTACTTCCTCTTCGCTCCAACACTCATCTACAG<br>GGAG |
| ACAT2<br>C277A.R     | CTCCCTGTAGATGAGTGTTGGAGCGAAGAGGAAGTAGAG<br>GTAGCT |

**Table S3 qRT-PCR primers**

| <u>Gene</u>                         | <u>Sequence</u>                                            |
|-------------------------------------|------------------------------------------------------------|
| <i>36B4</i>                         | F-5' CCCACTTACTGAAAAGGTCA<br>R-5' TTAGTCGAAGAGACCGAATC     |
| <i>Mus-PPAR<math>\gamma</math></i>  | F-5' ACCACAGTTGATTTCTCCAG<br>R-5' TAGAGCTGGGTCTTTTCAGA     |
| <i>Mus-aP2</i>                      | F-5' ACATGAAAGAAGTGGGAGTG<br>R-5' GGTTATGATGCTCTTCACCT     |
| <i>Mus-c/EBP<math>\alpha</math></i> | F-5' CAAGAACAGCAACGAGTACC<br>R-5' TTGACCAAGGAGCTCTCAG      |
| <i>Mus-Pref1</i>                    | F-5' CCATGAAAGAGCTCAACAAG<br>R-5' TACTGCAACAGGAGGTTCTT     |
| <i>Homo-ACAT1</i>                   | F-5' GAAGTTGGCAGTCACTTTGATGA<br>R-5' GAGCGCACCCACCATTATCTA |
| <i>Homo-ACAT2</i>                   | F-5' ATGGAAACACTGAGACGCACA<br>R-5' GGTAGGATTGTATAGCCTCCCG  |
| <i>Mus-Acat1</i>                    | F-5' GAAACCGGCTGTCAAATCTGG<br>R-5' TGTGACCATTTCTGTATGTGTCC |
| <i>Mus-Acat2</i>                    | F-5' ACAAGACAGACCTCTTCCCTC<br>R-5' ATGGTTCGGAAATGTTGCACC   |
| <i>Mus-Hmgcr</i>                    | F-5' ACTCTTGACGCTCTTGTGGA<br>R-5' CGAAGCAGCACATGATCTCC     |
| <i>Mus-Dgat1</i>                    | F-5' TCCGTCCAGGGTGGTAGTG<br>R-5' TGAACAAAGAATCTTGCAGACGA   |
| <i>Mus-Dgat2</i>                    | F-5' GCGCTACTTCCGAGACTACTT<br>R-5' GGGCCTTATGCCAGGAAACT    |

**Table S4 Relative  $\Delta$ CT values of *Acat1/2* in adipocytes comparing to that of *Dgat1/2***

|       | $\Delta$ CT value |                  |                  |                  |
|-------|-------------------|------------------|------------------|------------------|
|       | <i>Dgat1</i>      | <i>Dgat2</i>     | <i>Acat1</i>     | <i>Acat2</i>     |
| Day 0 | 6.04 $\pm$ 0.12   | 7.37 $\pm$ 0.37  | 10.33 $\pm$ 0.22 | 10.53 $\pm$ 0.25 |
| Day 8 | 1.26 $\pm$ 0.15   | -0.45 $\pm$ 0.09 | 4.6 $\pm$ 0.73   | 11.78 $\pm$ 0.33 |
